# Supplementary material for: REDalign: accurate RNA structural alignment using residual encoder-decoder network
Source: PubMed Central journal article supplement — BMC Bioinformatics. 2024 Nov 5;25:346. doi: 10.1186/s12859-024-05956-7 (PMC11539752; doi:10.1186/s12859-024-05956-7), 2024-11-05
Supplement: 12859_2024_5956_MOESM1_ESM.pdf [file 12859_2024_5956_MOESM1_ESM.pdf]

Table S1. List of RNA family groups and the number of sequences in the ncRNA training dataset. The families are grouped according the Rfam ID in the *Rfam* database 14.3.

| RNA family group   | Num. of sequences | RNA family group | Num. of sequences |
|--------------------|-------------------|------------------|-------------------|
| 5S_rRNA            | 12,000            | Intron_gpII      | 1,588             |
| 5_8S_rRNA          | 1,053             | IRES_HCV         | 1,226             |
| Archaea_SRP        | 1,036             | IRES_Picornia    | 1,433             |
| Bacteria_large_SRP | 1,588             | K_chan_RES       | 1,468             |
| Bacteria_small_SRP | 4,506             | Lysine           | 812               |
| Cobalamin          | 7,407             | Metazoa_SRP      | 915               |
| Entero_5_CRE       | 2,642             | mir_TAR          | 760               |
| Entero_CRE         | 967               | Plant_SRP        | 1,571             |
| Entero_OriR        | 1,036             | SAM              | 7,873             |
| Glycine            | 760               | SECIS_1          | 1,053             |
| Hammerhead_1       | 483               | SNORD113         | 1,019             |
| Hammerhead_3       | 1,416             | T-box            | 829               |
| HCV_SLIV           | 1,882             | THI              | 1,865             |
| HCV_SLVII          | 1,899             | tRNA             | 16,455            |
| HepC_CRE           | 898               | U1               | 1,727             |
| Histone3           | 794               | U2               | 3,557             |
| HIV_FE             | 2,124             | U6               | 3,229             |
| HIV_GSL3           | 1,226             | UnaL2            | 501               |
| HIV_PBS            | 2,072             | yybP-ykoY        | 501               |
| HIV-1_DIS          | 1,174             |                  |                   |
